# Supplementary material for: Community-level risk factors for active Pulmonary Tuberculosis and their implications for TB Control: An unmatched case-control study in Guji Zone, Oromia Region, Ethiopia
Source: Research Square preprint supplement (doi:10.21203/rs.3.rs-7407806/v1), 2025-09-23
Supplement: Supplementary file 1 [file 5f4e7b866f701ae54a25a48d.pdf]

## English version questionnaire

Questionnaire ID (For case use “CA”, for control use “CO”): \_\_\_\_\_

Name of Woreda & Heath Institution: \_\_\_\_\_

Interviewee No (e.g., “001”, “002” & “003” for the 1st, 2nd & 3rd, respectively): \_\_\_\_\_

### Part I: Socio-demographic characteristics-related questions

| S. No | Question                                             | Response                                                                                                                                                                                                                                                                                     | Skip |
|-------|------------------------------------------------------|----------------------------------------------------------------------------------------------------------------------------------------------------------------------------------------------------------------------------------------------------------------------------------------------|------|
| 101   | Sex of the respondent                                | 1. Male <input type="checkbox"/> 2. Female <input type="checkbox"/>                                                                                                                                                                                                                          |      |
| 102   | How old are you?                                     | _____ (Age in years)                                                                                                                                                                                                                                                                         |      |
| 103   | What is your current marital status?                 | 1. Married <input type="checkbox"/> 3. Divorced <input type="checkbox"/><br>2. Widowed <input type="checkbox"/> 4. Single (N. married) <input type="checkbox"/>                                                                                                                              |      |
| 104   | What is your religion?                               | 1. Orthodox 3. Protestant<br>2. Catholic 4. Muslim<br>5. Other (Specify) _____                                                                                                                                                                                                               |      |
| 105   | What is your Ethnicity?                              | 1. Oromo <input type="checkbox"/> 2. Amhara <input type="checkbox"/><br>3. Tigre <input type="checkbox"/> 4. Somali <input type="checkbox"/><br>5. Gurage <input type="checkbox"/> 6. Sidama <input type="checkbox"/><br>7. Other (Specify) _____                                            |      |
| 106   | What is the highest educational level you completed? | 1. No Education <input type="checkbox"/><br>2. Primary Education (1-8) <input type="checkbox"/><br>3. Secondary education (9-12) <input type="checkbox"/><br>4. College and above <input type="checkbox"/>                                                                                   |      |
| 107   | What is your current primary occupation?             | 1. Farmer <input type="checkbox"/><br>2. Miner <input type="checkbox"/><br>3. Employee (gov't/private) <input type="checkbox"/><br>4. Housewife <input type="checkbox"/><br>5. Daily laborer <input type="checkbox"/><br>6. Pastoralist <input type="checkbox"/><br>7. Other (Specify) _____ |      |
| 108   | <i>If miner for Q107, for how long?</i>              | _____ (Year/month)                                                                                                                                                                                                                                                                           |      |

|     |                                                                           |                                                                                                       |  |
|-----|---------------------------------------------------------------------------|-------------------------------------------------------------------------------------------------------|--|
| 109 | If miner for Q107, <i>which type of mineral?</i>                          | 1. Gold <input type="checkbox"/> 2. Non-gold <input type="checkbox"/>                                 |  |
| 110 | Where did you work? (Working condition)                                   | 1. Underground <input type="checkbox"/> 2. On surface <input type="checkbox"/>                        |  |
| 111 | Have you used any personal protective equipment (PPE) while mining?       | 1. Yes <input type="checkbox"/> 2. No <input type="checkbox"/>                                        |  |
| 112 | <i>Have you ever explored minerals?</i>                                   | 1. Yes <input type="checkbox"/> 2. No <input type="checkbox"/>                                        |  |
| 113 | <i>If yes to Q112, for how long?</i>                                      | _____(Year/month)                                                                                     |  |
| 114 | What is your current place of residence?                                  | 1. Urban <input type="checkbox"/> 2. Rural <input type="checkbox"/>                                   |  |
| 115 | Where is your current place of residence?                                 | ____&____(Woreda &kebele)                                                                             |  |
| 116 | Where is your previous place of residence?                                | ____&____(Woreda &kebele)                                                                             |  |
| 117 | What is your monthly income?                                              | ____ ETB<br>88. I don't know <input type="checkbox"/><br>99. Refused to tell <input type="checkbox"/> |  |
| 118 | Approximately how far is the health facility from your home?              | ____Km                                                                                                |  |
| 119 | Approximately how long does it take you to get health facility on a walk? | -----: ----- (hrs. & min)                                                                             |  |

## Part II: Behavioral factors/Lifestyle-related questions

| S. No. | Question                           | Response                                                                                                                                                                                                             | Skip |
|--------|------------------------------------|----------------------------------------------------------------------------------------------------------------------------------------------------------------------------------------------------------------------|------|
| 201    | Did you ever smoke cigarettes?     | 1. Yes <input type="checkbox"/> 2. No <input type="checkbox"/>                                                                                                                                                       |      |
| 202    | If yes to Q201, for how long?      | _____(Year/month)                                                                                                                                                                                                    |      |
| 203    | Number of cigarettes per day       | 1. Less than five <input type="checkbox"/><br>2. Five to ten <input type="checkbox"/><br>3. Above ten <input type="checkbox"/><br>88. I don't know <input type="checkbox"/> 99. No response <input type="checkbox"/> |      |
| 204    | Do you smoke cigarettes currently? | 1. Yes <input type="checkbox"/> 2. No <input type="checkbox"/>                                                                                                                                                       |      |
| 205    | Do you smoke shisha currently?     | 1. Yes <input type="checkbox"/> 2. No <input type="checkbox"/>                                                                                                                                                       |      |
| 206    | If yes to Q205, for how long?      | _____(Year/month)                                                                                                                                                                                                    |      |
| 207    | Do you drink alcohol currently?    | 1. Yes <input type="checkbox"/> 2. No <input type="checkbox"/>                                                                                                                                                       |      |
| 208    | If yes to Q207, for how long?      | _____(Year/month)                                                                                                                                                                                                    |      |

|     |                                                                                                                |                                                                                                                                                                                                                                                                                    |  |
|-----|----------------------------------------------------------------------------------------------------------------|------------------------------------------------------------------------------------------------------------------------------------------------------------------------------------------------------------------------------------------------------------------------------------|--|
| 209 | How frequent was alcohol consumption?                                                                          | 1. Daily <input type="checkbox"/> 2. Twice per week <input type="checkbox"/><br>3. Weekly <input type="checkbox"/> 4. Monthly <input type="checkbox"/><br>5. Rarely <input type="checkbox"/> 88. I don't know <input type="checkbox"/><br>99. No response <input type="checkbox"/> |  |
| 210 | How many drinks containing alcohol do you have on a day when you are drinking?<br>(In terms of standard drink) | 1. 1-2 <input type="checkbox"/><br>2. 3-4 <input type="checkbox"/><br>3. 5 and above <input type="checkbox"/>                                                                                                                                                                      |  |
| 211 | Do you chew khat currently?                                                                                    | 1. Yes <input type="checkbox"/> 2. No <input type="checkbox"/>                                                                                                                                                                                                                     |  |
| 212 | If yes to Q211, for how long?                                                                                  | _____ (Year/month)                                                                                                                                                                                                                                                                 |  |
| 213 | Do you use injectable IV drugs currently?                                                                      | 1. Yes <input type="checkbox"/> 2. No <input type="checkbox"/>                                                                                                                                                                                                                     |  |
| 214 | If yes to Q213, for how long?                                                                                  | _____ (Year/month)                                                                                                                                                                                                                                                                 |  |
| 215 | Do you consume raw milk currently?                                                                             | 1. Yes <input type="checkbox"/> 2. No <input type="checkbox"/>                                                                                                                                                                                                                     |  |

### Part III: Environmental factors-related questions

| S. No. | Question                                                                 | Response                                                       | Skip |
|--------|--------------------------------------------------------------------------|----------------------------------------------------------------|------|
| 301    | Number of family in HH                                                   | _____ (Persons)                                                |      |
| 302    | How many # of rooms your house has?                                      | _____ (Rooms)                                                  |      |
| 303    | Is there a TB patient in the family?                                     | 1. Yes <input type="checkbox"/> 2. No <input type="checkbox"/> |      |
| 304    | Do you have a recent history of close contact with a known TB patient?   | 1. Yes <input type="checkbox"/> 2. No <input type="checkbox"/> |      |
| 305    | Do you have a previous history of close contact with a known TB patient? | 1. Yes <input type="checkbox"/> 2. No <input type="checkbox"/> |      |
| 306    | Is there a family with previous TB history?                              | 1. Yes <input type="checkbox"/> 2. No <input type="checkbox"/> |      |
| 307    | Do you have close contact with a chronically coughing person?            | 1. Yes <input type="checkbox"/> 2. No <input type="checkbox"/> |      |
| 308    | <i>Have you ever been imprisoned?</i>                                    | 1. Yes <input type="checkbox"/> 2. No <input type="checkbox"/> |      |
| 309    | <i>If yes to Q 308, for how long?</i>                                    | _____ (Year/month)                                             |      |
| 310    | Have you ever been homeless?                                             | 1. Yes <input type="checkbox"/> 2. No <input type="checkbox"/> |      |
| 311    | Have you ever lived in IDPs/Refugee camps??                              | 1. Yes <input type="checkbox"/> 2. No <input type="checkbox"/> |      |

|     |                                                                 |                                                                                                                                                                     |  |
|-----|-----------------------------------------------------------------|---------------------------------------------------------------------------------------------------------------------------------------------------------------------|--|
| 312 | Are you living in IDP/refugee currently?                        | 1. Yes <input type="checkbox"/> 2. No <input type="checkbox"/>                                                                                                      |  |
| 313 | <i>If yes to Q 312, for how long?</i>                           | _____ (Year/month)                                                                                                                                                  |  |
| 314 | Does the HH have a separate kitchen?                            | 1. Yes <input type="checkbox"/> 2. No <input type="checkbox"/>                                                                                                      |  |
| 315 | Does the house have a window?                                   | 1. Yes <input type="checkbox"/> 2. No <input type="checkbox"/>                                                                                                      |  |
| 316 | If yes to Q315, how many in numbers?                            | _____ (Windows)                                                                                                                                                     |  |
| 317 | For how long does the window in the house remain open in a day? | 1. Whole day <input type="checkbox"/><br>2. Half a day <input type="checkbox"/><br>3. 2-3hrs <input type="checkbox"/><br>4. Never <input type="checkbox"/>          |  |
| 318 | What is the main source of fuel for cooking?                    | 1. Electricity <input type="checkbox"/><br>2. Gas or kerosene <input type="checkbox"/><br>3. Wood and charcoal <input type="checkbox"/><br>4. Other (Specify) _____ |  |

#### Part IV. Co-morbidities condition-related questions

| S. No | Questions                                            | Responses                                                                                                   | Skip |
|-------|------------------------------------------------------|-------------------------------------------------------------------------------------------------------------|------|
| 401   | Do you know your sero-status for HIV? *              | 1. Yes <input type="checkbox"/> 2. No <input type="checkbox"/>                                              |      |
| 402   | If yes to Q401, what was your result? *              | 1. Positive <input type="checkbox"/> 2. Negative <input type="checkbox"/>                                   |      |
| 403   | If positive to Q402, have you received HAART? *      | 1. Yes <input type="checkbox"/> 2. No <input type="checkbox"/>                                              |      |
| 404   | If yes to Q403, have you received IPT prophylaxis? * | 1. Yes <input type="checkbox"/> 2. No <input type="checkbox"/><br>88. I don't know <input type="checkbox"/> |      |
| 405   | Do you have a history of diabetes? *                 | 1. Yes <input type="checkbox"/> 2. No <input type="checkbox"/><br>88. I don't know <input type="checkbox"/> |      |
| 406   | Do you have a history of hypertension? *             | 1. Yes <input type="checkbox"/> 2. No <input type="checkbox"/><br>88. I don't know <input type="checkbox"/> |      |
| 407   | Do you have any other history of chronic disease? *  | 1. Yes <input type="checkbox"/> 2. No <input type="checkbox"/><br>88. I don't know <input type="checkbox"/> |      |
| 408   | Do you have a history of solid organ transplant? *   | 1. Yes <input type="checkbox"/> 2. No <input type="checkbox"/><br>88. I don't know <input type="checkbox"/> |      |

|     |                                                                |                                                                                                             |  |
|-----|----------------------------------------------------------------|-------------------------------------------------------------------------------------------------------------|--|
| 409 | Do you have a history of immunosuppressive drug therapy use? * | 1. Yes <input type="checkbox"/> 2. No <input type="checkbox"/><br>88. I don't know <input type="checkbox"/> |  |
| 410 | Weight of the respondent*                                      | _____kg                                                                                                     |  |
| 411 | Height of the respondent*                                      | _____meter                                                                                                  |  |

\*- Data may be filled from patient medical records/TB Unit register.

#### Part V. TB-related factors questions

| S. No | Questions                                                                                      | Responses                                                                                                                                                                                                                                                                                                                                                                                       | Skip |
|-------|------------------------------------------------------------------------------------------------|-------------------------------------------------------------------------------------------------------------------------------------------------------------------------------------------------------------------------------------------------------------------------------------------------------------------------------------------------------------------------------------------------|------|
| 501   | Have you ever heard about tuberculosis?                                                        | 1. Yes <input type="checkbox"/> 2. No <input type="checkbox"/>                                                                                                                                                                                                                                                                                                                                  |      |
| 502   | Where do you get information about TB for the first time?<br>(Multiple responses are possible) | 1.Spouse /relative <input type="checkbox"/><br>2.TB patient <input type="checkbox"/><br>3. Mass media (Radio, TV, social media, etc) <input type="checkbox"/><br>4. Medical personnel <input type="checkbox"/><br>5. School Education <input type="checkbox"/><br>6.Other (Specify) _____<br>88. I don't know <input type="checkbox"/>                                                          |      |
| 503   | What is the primary cause of pulmonary tuberculosis?                                           | 1. Bacteria/germs <input type="checkbox"/><br>2. Hereditary <input type="checkbox"/><br>3. Bad luck/curse <input type="checkbox"/><br>4. Poor sanitation <input type="checkbox"/><br>5. HIV/AIDs <input type="checkbox"/><br>6.Other (Specify) _____<br>88. I don't know <input type="checkbox"/>                                                                                               |      |
| 504   | What are the primary modes of TB transmission?<br>(Multiple responses are possible)            | 1. Coughing/sneezing <input type="checkbox"/><br>2. Ingesting unpasteurized milk <input type="checkbox"/><br>3. Handshaking <input type="checkbox"/><br>4. Mother to child during labor or pregnancy <input type="checkbox"/><br>5. Breastfeeding <input type="checkbox"/><br>6. Inherited from parents to child <input type="checkbox"/><br>7. Through sexual contact <input type="checkbox"/> |      |

|     |                                                                                                                |                                                                                                                                                                                                                                                                                                                                                                                                                                                           |  |
|-----|----------------------------------------------------------------------------------------------------------------|-----------------------------------------------------------------------------------------------------------------------------------------------------------------------------------------------------------------------------------------------------------------------------------------------------------------------------------------------------------------------------------------------------------------------------------------------------------|--|
|     |                                                                                                                | 8. Other (Specify) _____<br>88. I don't know <input type="checkbox"/>                                                                                                                                                                                                                                                                                                                                                                                     |  |
| 505 | What are the main symptoms /signs suggestive of tuberculosis?<br>(Multiple responses are possible)             | 1. Cough of two weeks or more period <input type="checkbox"/><br>2. Chest pain <input type="checkbox"/><br>3. Loss of weight <input type="checkbox"/><br>4. Night sweat <input type="checkbox"/><br>5. Bloody sputum <input type="checkbox"/><br>6. Other (Specify) _____<br>88. I don't know <input type="checkbox"/>                                                                                                                                    |  |
| 506 | Is TB a communicable disease?                                                                                  | 1. Yes <input type="checkbox"/> 2. No <input type="checkbox"/><br>88. I don't know <input type="checkbox"/>                                                                                                                                                                                                                                                                                                                                               |  |
| 507 | What are the possible modalities of prevention of pulmonary tuberculosis?<br>(Multiple responses are possible) | 1. Covering mouth and nose when coughing or sneezing <input type="checkbox"/><br>2. Avoid sharing dishes, spoons, cups... <input type="checkbox"/><br>3. Avoiding people who appear to have TB <input type="checkbox"/><br>4. By vaccination <input type="checkbox"/><br>5. Avoiding congregate setting <input type="checkbox"/><br>6. Avoid handshakes <input type="checkbox"/><br>7. Other (Specify) _____<br>88. I don't know <input type="checkbox"/> |  |
| 508 | Who is at risk of getting TB?<br>(Multiple responses are possible)                                             | 1. The poor <input type="checkbox"/><br>2. Those who live with TB patients <input type="checkbox"/><br>3. Person with HIV <input type="checkbox"/><br>4. Smokers/drinker <input type="checkbox"/><br>5. Other (Specify) _____<br>88. I don't know <input type="checkbox"/>                                                                                                                                                                                |  |
| 509 | Is TB a curable disease?                                                                                       | 1. Yes <input type="checkbox"/> 2. No <input type="checkbox"/><br>88. I don't know <input type="checkbox"/>                                                                                                                                                                                                                                                                                                                                               |  |
| 510 | How can someone with TB cured?                                                                                 | 1. Drugs specifically for TB <input type="checkbox"/><br>2. Herbal remedies <input type="checkbox"/><br>3. Praying and fasting or holy water <input type="checkbox"/><br>4. Good nutrition <input type="checkbox"/><br>5. Other (Specify) _____<br>88. I don't know <input type="checkbox"/>                                                                                                                                                              |  |
| 511 | Do you know that TB treatment is free of payment?                                                              | 1. Yes <input type="checkbox"/> 2. No <input type="checkbox"/><br>88. I don't know <input type="checkbox"/>                                                                                                                                                                                                                                                                                                                                               |  |

|     |                                                                                                  |                                                                                                                                                                                                               |  |
|-----|--------------------------------------------------------------------------------------------------|---------------------------------------------------------------------------------------------------------------------------------------------------------------------------------------------------------------|--|
| 512 | Have you ever had TB disease?                                                                    | 1. Yes <input type="checkbox"/> 2. No <input type="checkbox"/>                                                                                                                                                |  |
| 513 | If yes to Q512, did you take treatment?                                                          | 1. Yes <input type="checkbox"/> 2. No <input type="checkbox"/>                                                                                                                                                |  |
| 514 | If yes to Q513, did you complete the full course of anti-TB treatment?                           | 1. Yes <input type="checkbox"/> 2. No <input type="checkbox"/>                                                                                                                                                |  |
| 515 | If yes to Q514, what was the final treatment outcome? *                                          | 1. Cured <input type="checkbox"/><br>2. Treatment complete <input type="checkbox"/><br>3. Lost to follow-up <input type="checkbox"/><br>4. Other (Specify) _____<br>88. I don't know <input type="checkbox"/> |  |
| 516 | Have you received vaccination for BCG?                                                           | 1. Yes <input type="checkbox"/> 2. No <input type="checkbox"/><br>88. I don't know <input type="checkbox"/>                                                                                                   |  |
| 517 | Do you have a recent history of hospital admission?                                              | 1. Yes <input type="checkbox"/> 2. No <input type="checkbox"/>                                                                                                                                                |  |
| 518 | Who is responsible to implement IPC in the health facility?<br>(Multiple responses are possible) | 1. Health care workers <input type="checkbox"/><br>2. All clients visiting HF <input type="checkbox"/><br>88. I don't know <input type="checkbox"/>                                                           |  |

**\*- Data may be filled from patient medical records/TB Unit register.**

**Thank you!**
